# Supplementary material for: Effect of an enhanced public health contact tracing intervention on the secondary transmission of SARS-CoV-2 in educational settings: The four-way decomposition analysis
Source: eLife. 2024 Feb 28;13:e85802. doi: 10.7554/eLife.85802 (PMC10901504; doi:10.7554/eLife.85802)
Supplement: Supplementary file 3. [file elife-85802-supp3.xlsx]

## Sheet: Data
Date of the swab	Week	Tracing delay	Known contact
2020-09-03	1		unknown
2020-09-11	2		known
2020-09-17	3	2	known
2020-09-17	3	2	known
2020-09-17	3	2	known
2020-09-18	3	1	known
2020-09-18	3	1	known
2020-09-18	3	2	unknown
2020-09-18	3	3	known
2020-09-21	3	2	unknown
2020-09-24	4	1	unknown
2020-09-26	4	1	unknown
2020-09-26	4	2	known
2020-09-27	4	5	known
2020-09-27	4	1	known
2020-09-27	4	1	known
2020-09-27	4	1	known
2020-09-30	4	2	known
2020-10-02	5	7	known
2020-10-02	5	3	known
2020-10-02	5	3	known
2020-10-02	5	2	unknown
2020-10-03	5	3	known
2020-10-03	5	3	known
2020-10-03	5	5	known
2020-10-05	5	5	known
2020-10-05	5	2	known
2020-10-05	5	2	known
2020-10-05	5	11	known
2020-10-05	5	8	unknown
2020-10-07	5	3	known
2020-10-07	5	7	unknown
2020-10-07	5	3	known
2020-10-08	6	8	unknown
2020-10-08	6	5	known
2020-10-08	6	8	unknown
2020-10-08	6	6	known
2020-10-08	6	5	known
2020-10-08	6	8	known
2020-10-08	6	2	known
2020-10-09	6	11	known
2020-10-09	6	6	unknown
2020-10-09	6	14	known
2020-10-09	6	11	known
2020-10-10	6	12	unknown
2020-10-10	6	11	known
2020-10-10	6	11	known
2020-10-10	6	10	unknown
2020-10-10	6	13	unknown
2020-10-10	6	5	known
2020-10-10	6	10	unknown
2020-10-11	6	9	known
2020-10-11	6	8	known
2020-10-12	6	10	known
2020-10-12	6	3	known
2020-10-12	6	18	known
2020-10-12	6	4	unknown
2020-10-13	6	13	known
2020-10-13	6	2	known
2020-10-13	6	9	known
2020-10-13	6	10	known
2020-10-13	6	11	unknown
2020-10-13	6	10	known
2020-10-13	6	7	unknown
2020-10-13	6	9	known
2020-10-14	6	10	unknown
2020-10-14	6	4	unknown
2020-10-14	6	9	unknown
2020-10-14	6	7	unknown
2020-10-14	6	2	unknown
2020-10-14	6	10	unknown
2020-10-14	6	10	unknown
2020-10-14	6	2	unknown
2020-10-14	6	11	known
2020-10-14	6	6	known
2020-10-15	7	8	unknown
2020-10-15	7	4	unknown
2020-10-15	7	9	unknown
2020-10-15	7	8	unknown
2020-10-15	7	5	known
2020-10-15	7	9	unknown
2020-10-15	7	9	known
2020-10-15	7	7	unknown
2020-10-16	7	8	unknown
2020-10-16	7	8	unknown
2020-10-16	7	10	unknown
2020-10-16	7	8	known
2020-10-16	7	7	unknown
2020-10-16	7	8	unknown
2020-10-16	7	8	unknown
2020-10-16	7	7	unknown
2020-10-16	7	4	known
2020-10-16	7	6	known
2020-10-16	7	8	unknown
2020-10-17	7	9	known
2020-10-17	7	1	unknown
2020-10-17	7	1	unknown
2020-10-17	7	8	known
2020-10-17	7	9	unknown
2020-10-17	7	1	unknown
2020-10-17	7	9	known
2020-10-17	7	1	unknown
2020-10-17	7	6	unknown
2020-10-17	7	12	known
2020-10-17	7	11	known
2020-10-17	7	8	unknown
2020-10-17	7	7	unknown
2020-10-17	7	1	unknown
2020-10-18	7	6	unknown
2020-10-18	7		known
2020-10-18	7	11	known
2020-10-18	7	8	known
2020-10-18	7	8	known
2020-10-18	7	7	known
2020-10-19	7	7	unknown
2020-10-20	7	6	known
2020-10-20	7	8	unknown
2020-10-20	7	6	unknown
2020-10-20	7	5	unknown
2020-10-20	7	4	unknown
2020-10-20	7	6	known
2020-10-20	7	11	unknown
2020-10-21	7	11	unknown
2020-10-21	7	7	known
2020-10-21	7	7	known
2020-10-22	8	11	unknown
2020-10-22	8	8	known
2020-10-22	8	10	unknown
2020-10-22	8	9	unknown
2020-10-23	8	9	unknown
2020-10-23	8	9	unknown
2020-10-23	8	3	known
2020-10-23	8	14	unknown
2020-10-23	8	12	unknown
2020-10-23	8	12	unknown
2020-10-23	8	17	known
2020-10-23	8	9	known
2020-10-23	8	5	unknown
2020-10-23	8	9	unknown
2020-10-23	8	9	unknown
2020-10-23	8	13	unknown
2020-10-23	8	8	unknown
2020-10-23	8	11	unknown
2020-10-23	8	7	known
2020-10-24	8	4	known
2020-10-24	8	10	unknown
2020-10-24	8	7	unknown
2020-10-24	8	5	known
2020-10-24	8	3	unknown
2020-10-24	8	15	unknown
2020-10-24	8	5	unknown
2020-10-24	8	5	unknown
2020-10-24	8	11	unknown
2020-10-24	8	5	known
2020-10-25	8	0	unknown
2020-10-25	8	8	unknown
2020-10-25	8	3	known
2020-10-25	8	8	unknown
2020-10-25	8	5	known
2020-10-25	8	12	unknown
2020-10-25	8	8	unknown
2020-10-25	8	11	unknown
2020-10-25	8	11	known
2020-10-25	8	0	unknown
2020-10-25	8	5	known
2020-10-25	8	6	unknown
2020-10-25	8	4	unknown
2020-10-26	8	7	known
2020-10-26	8	8	known
2020-10-26	8	5	known
2020-10-26	8	13	known
2020-10-26	8	12	known
2020-10-26	8	11	unknown
2020-10-26	8	7	known
2020-10-26	8	5	unknown
2020-10-26	8	3	unknown
2020-10-26	8	10	unknown
2020-10-26	8	8	unknown
2020-10-26	8	0	unknown
2020-10-26	8	13	known
2020-10-26	8	12	unknown
2020-10-26	8	15	unknown
2020-10-26	8	10	unknown
2020-10-27	8	8	unknown
2020-10-27	8	4	unknown
2020-10-27	8	6	known
2020-10-27	8	6	known
2020-10-27	8	5	known
2020-10-27	8	12	unknown
2020-10-27	8	6	unknown
2020-10-27	8	12	unknown
2020-10-27	8	5	known
2020-10-27	8	12	unknown
2020-10-27	8	9	unknown
2020-10-27	8	6	unknown
2020-10-27	8	11	unknown
2020-10-27	8	10	known
2020-10-27	8	6	unknown
2020-10-27	8	9	unknown
2020-10-27	8	12	unknown
2020-10-27	8	5	unknown
2020-10-27	8		known
2020-10-28	8	6	unknown
2020-10-28	8	6	unknown
2020-10-28	8	10	unknown
2020-10-28	8	14	known
2020-10-28	8	8	unknown
2020-10-28	8	5	unknown
2020-10-28	8	13	known
2020-10-28	8		known
2020-10-28	8	12	unknown
2020-10-28	8	8	unknown
2020-10-28	8	18	known
2020-10-28	8	0	unknown
2020-10-28	8	8	known
2020-10-28	8	7	known
2020-10-28	8	5	unknown
2020-10-29	9	5	known
2020-10-29	9		known
2020-10-29	9	5	unknown
2020-10-29	9	12	unknown
2020-10-29	9	9	unknown
2020-10-29	9	11	unknown
2020-10-29	9	11	unknown
2020-10-29	9	7	unknown
2020-10-30	9	7	unknown
2020-10-30	9	4	known
2020-10-30	9	12	unknown
2020-10-30	9	16	unknown
2020-10-30	9	7	unknown
2020-10-30	9	10	known
2020-10-30	9	7	unknown
2020-10-30	9	19	unknown
2020-10-30	9	3	known
2020-10-31	9	6	unknown
2020-10-31	9	9	unknown
2020-10-31	9	7	unknown
2020-10-31	9	9	known
2020-10-31	9	9	unknown
2020-10-31	9	11	unknown
2020-10-31	9	11	unknown
2020-10-31	9	9	unknown
2020-10-31	9	9	unknown
2020-10-31	9	8	unknown
2020-10-31	9	6	known
2020-10-31	9	7	unknown
2020-10-31	9	10	unknown
2020-10-31	9	10	known
2020-11-01	9	6	unknown
2020-11-01	9	6	known
2020-11-01	9	3	known
2020-11-01	9	6	unknown
2020-11-01	9	11	unknown
2020-11-01	9	14	unknown
2020-11-01	9	9	unknown
2020-11-01	9	7	unknown
2020-11-01	9	8	known
2020-11-01	9	8	unknown
2020-11-01	9	9	unknown
2020-11-01	9	5	unknown
2020-11-01	9	6	known
2020-11-01	9	15	unknown
2020-11-01	9	8	known
2020-11-01	9	6	unknown
2020-11-01	9	6	known
2020-11-01	9	7	unknown
2020-11-01	9	8	unknown
2020-11-01	9	9	known
2020-11-01	9	8	unknown
2020-11-01	9	5	unknown
2020-11-01	9	5	unknown
2020-11-02	9	13	known
2020-11-02	9	18	unknown
2020-11-02	9	8	unknown
2020-11-02	9	13	unknown
2020-11-03	9	10	unknown
2020-11-03	9	5	unknown
2020-11-03	9	3	unknown
2020-11-03	9	10	unknown
2020-11-03	9	13	unknown
2020-11-03	9		unknown
2020-11-04	9		known
2020-11-04	9	7	known
2020-11-04	9	7	known
2020-11-05	10	19	unknown
2020-11-05	10	4	known
2020-11-05	10	30	unknown
2020-11-05	10	5	unknown
2020-11-06	10	7	unknown
2020-11-06	10	14	unknown
2020-11-06	10	13	known
2020-11-06	10	13	unknown
2020-11-06	10	7	unknown
2020-11-06	10	11	unknown
2020-11-06	10	6	unknown
2020-11-06	10	6	unknown
2020-11-06	10	9	unknown
2020-11-06	10	9	unknown
2020-11-06	10	14	unknown
2020-11-07	10	5	unknown
2020-11-07	10	5	unknown
2020-11-07	10	9	unknown
2020-11-08	10	10	unknown
2020-11-08	10	8	unknown
2020-11-08	10	11	unknown
2020-11-08	10	10	unknown
2020-11-08	10	9	unknown
2020-11-08	10	7	unknown
2020-11-09	10	8	unknown
2020-11-09	10	11	unknown
2020-11-09	10	10	unknown
2020-11-09	10	14	unknown
2020-11-09	10	14	unknown
2020-11-09	10	8	unknown
2020-11-10	10	10	unknown
2020-11-10	10	9	unknown
2020-11-10	10	10	known
2020-11-10	10	9	known
2020-11-10	10	10	known
2020-11-10	10	8	unknown
2020-11-10	10	0	unknown
2020-11-11	10	3	unknown
2020-11-11	10	6	unknown
2020-11-11	10	20	unknown
2020-11-11	10	6	unknown
2020-11-11	10	5	unknown
2020-11-11	10	12	known
2020-11-11	10	7	unknown
2020-11-11	10	12	unknown
2020-11-12	11	14	unknown
2020-11-12	11	6	unknown
2020-11-12	11	6	unknown
2020-11-12	11	6	unknown
2020-11-12	11	3	known
2020-11-12	11	14	unknown
2020-11-12	11	33	unknown
2020-11-12	11	9	known
2020-11-13	11	3	unknown
2020-11-13	11	5	unknown
2020-11-13	11	6	unknown
2020-11-13	11	11	unknown
2020-11-13	11	12	unknown
2020-11-13	11	6	unknown
2020-11-13	11	8	unknown
2020-11-13	11	11	unknown
2020-11-14	11	4	known
2020-11-14	11	4	unknown
2020-11-14	11	4	unknown
2020-11-14	11	11	unknown
2020-11-14	11	6	unknown
2020-11-14	11	1	known
2020-11-14	11	4	known
2020-11-15	11	6	unknown
2020-11-15	11	4	unknown
2020-11-15	11	3	known
2020-11-15	11	7	unknown
2020-11-15	11	7	unknown
2020-11-15	11	4	unknown
2020-11-15	11	4	unknown
2020-11-15	11	9	known
2020-11-15	11	7	unknown
2020-11-15	11	5	unknown
2020-11-15	11	10	unknown
2020-11-15	11	7	unknown
2020-11-16	11	12	unknown
2020-11-16	11	3	known
2020-11-16	11	8	unknown
2020-11-16	11		unknown
2020-11-17	11	9	unknown
2020-11-17	11	9	known
2020-11-17	11	4	unknown
2020-11-17	11	7	unknown
2020-11-17	11	0	unknown
2020-11-17	11	9	known
2020-11-17	11	10	unknown
2020-11-17	11	5	known
2020-11-18	11	5	unknown
2020-11-18	11	4	known
2020-11-18	11	6	unknown
2020-11-18	11	9	unknown
2020-11-18	11	6	unknown
2020-11-18	11	11	unknown
2020-11-18	11	5	unknown
2020-11-18	11	6	unknown
2020-11-18	11	5	unknown
2020-11-18	11	5	unknown
2020-11-19	12	16	known
2020-11-19	12	3	unknown
2020-11-19	12	5	unknown
2020-11-19	12	3	unknown
2020-11-19	12	5	unknown
2020-11-19	12	7	unknown
2020-11-19	12	3	unknown
2020-11-19	12	3	unknown
2020-11-19	12	9	unknown
2020-11-19	12	9	unknown
2020-11-19	12	3	unknown
2020-11-19	12	7	unknown
2020-11-19	12	6	known
2020-11-19	12	8	known
2020-11-19	12	11	unknown
2020-11-19	12	3	unknown
2020-11-19	12	4	unknown
2020-11-20	12	6	unknown
2020-11-20	12	8	unknown
2020-11-20	12	11	unknown
2020-11-20	12		unknown
2020-11-20	12	8	unknown
2020-11-20	12		unknown
2020-11-20	12	13	unknown
2020-11-20	12	8	unknown
2020-11-20	12	7	unknown
2020-11-20	12	5	unknown
2020-11-20	12		unknown
2020-11-20	12		unknown
2020-11-20	12	3	known
2020-11-20	12	5	unknown
2020-11-20	12	7	known
2020-11-20	12		unknown
2020-11-20	12		unknown
2020-11-20	12	8	unknown
2020-11-20	12		unknown
2020-11-20	12	0	unknown
2020-11-20	12	7	known
2020-11-20	12		unknown
2020-11-20	12		unknown
2020-11-20	12	6	unknown
2020-11-20	12	6	unknown
2020-11-20	12	5	unknown
2020-11-21	12	6	unknown
2020-11-21	12	4	unknown
2020-11-21	12	4	unknown
2020-11-21	12	6	unknown
2020-11-21	12	7	known
2020-11-21	12	6	unknown
2020-11-21	12	5	unknown
2020-11-21	12	6	known
2020-11-22	12	4	known
2020-11-22	12	12	unknown
2020-11-22	12	5	unknown
2020-11-22	12	8	known
2020-11-22	12	6	unknown
2020-11-23	12	9	unknown
2020-11-23	12	6	unknown
2020-11-23	12	9	known
2020-11-23	12	5	known
2020-11-23	12	6	unknown
2020-11-23	12	7	unknown
2020-11-23	12	6	unknown
2020-11-24	12	7	unknown
2020-11-24	12	10	unknown
2020-11-24	12	8	known
2020-11-24	12	7	unknown
2020-11-24	12	9	unknown
2020-11-24	12	7	unknown
2020-11-24	12	10	known
2020-11-24	12	10	known
2020-11-24	12	7	unknown
2020-11-24	12	6	known
2020-11-24	12	7	unknown
2020-11-24	12	7	unknown
2020-11-24	12	10	unknown
2020-11-25	12	10	unknown
2020-11-25	12	8	unknown
2020-11-25	12	9	unknown
2020-11-25	12	10	unknown
2020-11-25	12	8	unknown
2020-11-25	12	6	unknown
2020-11-25	12	6	known
2020-11-26	13	8	unknown
2020-11-26	13	7	known
2020-11-26	13	9	unknown
2020-11-26	13	7	unknown
2020-11-27	13	8	unknown
2020-11-27	13	4	unknown
2020-11-27	13	4	unknown
2020-11-27	13	9	unknown
2020-11-27	13	8	known
2020-11-27	13	8	unknown
2020-11-27	13	6	unknown
2020-11-27	13	7	unknown
2020-11-27	13	8	unknown
2020-11-27	13	6	unknown
2020-11-27	13	7	unknown
2020-11-27	13	9	unknown
2020-11-27	13	8	unknown
2020-11-27	13	7	unknown
2020-11-27	13	9	unknown
2020-11-27	13	7	unknown
2020-11-27	13	8	unknown
2020-11-28	13	4	unknown
2020-11-28	13	5	known
2020-11-28	13	6	unknown
2020-11-28	13	4	unknown
2020-11-28	13	3	unknown
2020-11-28	13	9	known
2020-11-28	13	3	known
2020-11-29	13	5	known
2020-11-29	13	4	unknown
2020-11-29	13	3	known
2020-11-29	13	3	unknown
2020-11-29	13	3	known
2020-11-29	13	3	unknown
2020-11-29	13	4	unknown
2020-11-29	13	4	unknown
2020-11-29	13	4	unknown
2020-11-29	13	3	unknown
2020-11-30	13	2	unknown
2020-11-30	13	2	known
2020-11-30	13	14	known
2020-11-30	13	2	known
2020-12-01	13	3	unknown
2020-12-01	13	2	unknown
2020-12-01	13	2	unknown
2020-12-01	13	2	unknown
2020-12-01	13	2	unknown
2020-12-01	13	5	known
2020-12-01	13	5	known
2020-12-01	13	5	known
2020-12-01	13	2	unknown
2020-12-01	13	3	unknown
2020-12-01	13	3	unknown
2020-12-02	13	3	unknown
2020-12-02	13	2	unknown
2020-12-02	13	4	known
2020-12-02	13	4	known
2020-12-02	13	3	unknown
2020-12-02	13	4	known
2020-12-03	14	9	unknown
2020-12-03	14	2	unknown
2020-12-03	14	9	unknown
2020-12-03	14	1	unknown
2020-12-03	14	3	unknown
2020-12-03	14	2	unknown
2020-12-03	14	2	unknown
2020-12-03	14	8	unknown
2020-12-03	14	2	unknown
2020-12-03	14	2	unknown
2020-12-03	14	9	unknown
2020-12-03	14	2	unknown
2020-12-03	14	2	unknown
2020-12-04	14	6	known
2020-12-04	14	4	known
2020-12-04	14	3	known
2020-12-04	14	4	known
2020-12-04	14	7	known
2020-12-04	14	2	known
2020-12-04	14	6	known
2020-12-04	14	5	known
2020-12-04	14	6	known
2020-12-04	14	2	unknown
2020-12-04	14	4	known
2020-12-04	14	4	unknown
2020-12-04	14	7	known
2020-12-04	14	3	unknown
2020-12-04	14	7	known
2020-12-04	14	6	known
2020-12-04	14	6	unknown
2020-12-04	14	7	known
2020-12-04	14	7	unknown
2020-12-04	14	6	unknown
2020-12-05	14	4	known
2020-12-05	14	3	known
2020-12-05	14	6	unknown
2020-12-05	14	3	unknown
2020-12-05	14	7	known
2020-12-05	14	6	known
2020-12-05	14	6	unknown
2020-12-05	14	4	known
2020-12-05	14	6	unknown
2020-12-05	14	8	unknown
2020-12-05	14	4	known
2020-12-05	14	5	known
2020-12-05	14	6	known
2020-12-05	14	4	unknown
2020-12-05	14	3	unknown
2020-12-05	14	7	unknown
2020-12-05	14	5	known
2020-12-05	14	4	known
2020-12-05	14	3	known
2020-12-05	14	3	unknown
2020-12-05	14	4	known
2020-12-05	14	5	known
2020-12-05	14	4	known
2020-12-05	14	4	known
2020-12-05	14	4	known
2020-12-05	14	3	unknown
2020-12-06	14	6	known
2020-12-06	14	5	known
2020-12-06	14	4	unknown
2020-12-06	14	5	known
2020-12-06	14	4	known
2020-12-06	14	7	known
2020-12-06	14	2	unknown
2020-12-06	14	4	known
2020-12-06	14	7	known
2020-12-06	14	5	known
2020-12-06	14	6	known
2020-12-06	14	6	known
2020-12-07	14	5	unknown
2020-12-07	14	9	known
2020-12-07	14	6	known
2020-12-07	14	5	unknown
2020-12-07	14	5	unknown
2020-12-07	14	5	unknown
2020-12-07	14	4	known
2020-12-07	14	9	known
2020-12-07	14	3	unknown
2020-12-07	14	3	unknown
2020-12-07	14	3	unknown
2020-12-07	14	5	unknown
2020-12-07	14	5	unknown
2020-12-07	14	6	known
2020-12-07	14	0	unknown
2020-12-07	14	9	known
2020-12-07	14	2	known
2020-12-07	14	5	unknown
2020-12-07	14	3	known
2020-12-07	14	6	known
2020-12-08	14	3	known
2020-12-08	14	3	known
2020-12-08	14	3	unknown
2020-12-08	14	3	unknown
2020-12-08	14	2	known
2020-12-08	14	5	unknown
2020-12-08	14	5	known
2020-12-09	14	2	unknown
2020-12-09	14	3	unknown
2020-12-09	14	2	unknown
2020-12-09	14	3	known
2020-12-09	14	3	known
2020-12-10	15	5	known
2020-12-10	15	5	known
2020-12-10	15	5	known
2020-12-10	15		unknown
2020-12-10	15	3	known
2020-12-10	15	3	known
2020-12-11	15	3	unknown
2020-12-11	15	6	unknown
2020-12-11	15	6	unknown
2020-12-11	15	3	unknown
2020-12-11	15	3	unknown
2020-12-11	15	1	unknown
2020-12-11	15	3	unknown
2020-12-11	15	6	unknown
2020-12-11	15	3	unknown
2020-12-11	15	4	known
2020-12-11	15	4	unknown
2020-12-11	15	2	known
2020-12-11	15	6	unknown
2020-12-11	15	5	unknown
2020-12-11	15		unknown
2020-12-11	15	2	known
2020-12-11	15	4	known
2020-12-11	15	2	known
2020-12-11	15	4	known
2020-12-11	15	4	known
2020-12-11	15	3	unknown
2020-12-11	15	3	unknown
2020-12-11	15	3	unknown
2020-12-12	15	4	unknown
2020-12-12	15	4	unknown
2020-12-12	15	3	known
2020-12-12	15	3	unknown
2020-12-12	15	3	unknown
2020-12-13	15	2	known
2020-12-13	15	4	known
2020-12-13	15	4	known
2020-12-13	15	3	unknown
2020-12-13	15	4	unknown
2020-12-13	15	3	unknown
2020-12-13	15	4	known
2020-12-13	15	3	unknown
2020-12-13	15	3	known
2020-12-14	15	3	known
2020-12-14	15	2	known
2020-12-14	15	2	unknown
2020-12-14	15	3	known
2020-12-14	15	2	unknown
2020-12-14	15	3	known
2020-12-15	15		unknown
2020-12-15	15	6	unknown
2020-12-15	15	6	unknown
2020-12-15	15	2	known
2020-12-15	15	2	known
2020-12-15	15	6	unknown
2020-12-15	15	2	unknown
2020-12-15	15	2	known
2020-12-15	15	2	unknown
2020-12-15	15	2	known
2020-12-15	15	2	unknown
2020-12-15	15	2	unknown
2020-12-16	15	2	unknown
2020-12-16	15	3	unknown
2020-12-16	15	3	known
2020-12-16	15	2	unknown
2020-12-16	15	3	unknown
2020-12-16	15	2	known
2020-12-16	15	2	unknown
2020-12-16	15	2	unknown
2020-12-16	15	3	unknown
2020-12-16	15	2	unknown
2020-12-16	15	3	unknown
2020-12-17	16	3	known
2020-12-17	16	3	known
2020-12-17	16	2	known
2020-12-17	16	4	known
2020-12-17	16	2	unknown
2020-12-17	16	3	known
2020-12-17	16	3	known
2020-12-17	16	2	known
2020-12-17	16	5	known
2020-12-18	16	3	unknown
2020-12-18	16	3	known
2020-12-18	16	1	unknown
2020-12-18	16	3	unknown
2020-12-18	16	3	unknown
2020-12-18	16	2	unknown
2020-12-18	16	2	unknown
2020-12-18	16	2	unknown
2020-12-18	16	2	unknown
2020-12-18	16	4	known
2020-12-18	16	2	known
2020-12-18	16	2	unknown
2020-12-18	16	1	unknown
2020-12-18	16		unknown
2020-12-18	16	2	unknown
2020-12-18	16	1	unknown
2020-12-18	16	3	unknown
2020-12-18	16	3	unknown
2020-12-18	16	4	known
2020-12-18	16	3	known
2020-12-18	16	2	known
2020-12-18	16	3	known
2020-12-18	16	1	unknown
2020-12-18	16	2	unknown
2020-12-18	16	2	unknown
2020-12-18	16	4	known
2020-12-18	16	2	unknown
2020-12-18	16	3	unknown
2020-12-18	16	2	unknown
2020-12-19	16	4	known
2020-12-19	16	3	unknown
2020-12-19	16	1	known
2020-12-19	16	3	unknown
2020-12-19	16	3	unknown
2020-12-19	16	3	known
2020-12-19	16	4	unknown
2020-12-19	16	3	known
2020-12-19	16	3	known
2020-12-19	16	3	known
2020-12-19	16	2	known
2020-12-19	16	3	known
2020-12-19	16	4	unknown
2020-12-20	16	3	unknown
2020-12-20	16	3	known
2020-12-21	16	3	unknown
2020-12-21	16	2	unknown
2020-12-21	16	2	unknown
2020-12-21	16	3	known
2020-12-21	16	2	unknown
2020-12-21	16	2	unknown
2020-12-21	16	2	known
2020-12-21	16	2	known
2020-12-21	16	2	unknown
2020-12-22	16	2	unknown
2020-12-22	16	2	unknown
2020-12-22	16	2	known
2020-12-22	16	8	unknown
2020-12-22	16	2	unknown
2020-12-22	16	2	unknown
2020-12-22	16	2	unknown
2020-12-22	16	1	known
2020-12-22	16	2	unknown
2020-12-23	16	8	known
2020-12-23	16	4	known
2020-12-23	16	2	known
2020-12-23	16	2	unknown
2020-12-23	16	3	unknown
2020-12-23	16	1	unknown
2020-12-23	16	6	known
2020-12-23	16	1	unknown
2020-12-23	16	2	unknown
2020-12-23	16	2	known
2020-12-23	16	3	known
2020-12-24	17	3	unknown
2020-12-24	17	2	unknown
2020-12-24	17	4	unknown
2020-12-24	17	3	unknown
2020-12-24	17	2	known
2020-12-24	17	3	known
2020-12-24	17	5	unknown
2020-12-24	17	4	known
2020-12-25	17	3	known
2020-12-25	17	4	known
2020-12-25	17	2	unknown
2020-12-25	17	2	known
2020-12-25	17	2	known
2020-12-25	17	4	known
2020-12-25	17	3	known
2020-12-26	17	4	known
2020-12-26	17	2	known
2020-12-26	17	3	unknown
2020-12-26	17	3	known
2020-12-27	17	4	known
2020-12-27	17	4	known
2020-12-27	17	4	known
2020-12-27	17	3	known
2020-12-27	17	4	unknown
2020-12-27	17	2	known
2020-12-27	17	3	unknown
2020-12-28	17		unknown
2020-12-29	17		known
2020-12-29	17	3	known
2020-12-29	17	4	unknown
2020-12-29	17	2	known
2020-12-29	17	5	known
2020-12-29	17		unknown
2020-12-29	17	2	known
2020-12-30	17	6	known
2020-12-30	17	4	known
2020-12-30	17	3	unknown
2020-12-30	17	4	unknown
2020-12-31	18	5	known
2020-12-31	18	3	known
2020-12-31	18	5	known
2020-12-31	18	5	known
2021-01-01	18	4	unknown
2021-01-01	18	4	known
2021-01-02	18	4	known
2021-01-04	18	33	known
2021-01-04	18	2	known
2021-01-04	18	0	unknown
2021-01-04	18	2	known
2021-01-04	18	3	known
2021-01-05	18	2	known
2021-01-08	19	6	unknown
2021-01-08	19	3	known
2021-01-08	19	2	known
2021-01-08	19	6	unknown
2021-01-08	19	3	unknown
2021-01-09	19	3	known
2021-01-09	19	4	known
2021-01-09	19	3	unknown
2021-01-09	19	3	known
2021-01-09	19	3	known
2021-01-09	19	3	known
2021-01-09	19	3	known
2021-01-09	19	4	known
2021-01-09	19	3	unknown
2021-01-10	19	4	known
2021-01-10	19	2	unknown
2021-01-11	19	2	known
2021-01-11	19	2	known
2021-01-12	19	2	known
2021-01-12	19	3	unknown
2021-01-12	19	2	known
2021-01-12	19	9	unknown
2021-01-12	19	4	known
2021-01-12	19	3	unknown
2021-01-12	19	2	unknown
2021-01-12	19	2	known
2021-01-12	19	2	known
2021-01-12	19	3	unknown
2021-01-12	19	3	unknown
2021-01-12	19	2	unknown
2021-01-12	19		unknown
2021-01-12	19	3	known
2021-01-12	19	9	unknown
2021-01-12	19	2	known
2021-01-12	19	2	known
2021-01-12	19	1	known
2021-01-13	19	3	known
2021-01-13	19	1	unknown
2021-01-13	19	2	known
2021-01-13	19	1	unknown
2021-01-13	19	2	known
2021-01-13	19	3	known
2021-01-13	19	3	unknown
2021-01-13	19	5	known
2021-01-13	19	1	unknown
2021-01-14	20	2	known
2021-01-14	20	2	known
2021-01-14	20	2	known
2021-01-14	20	3	unknown
2021-01-14	20	2	known
2021-01-14	20	2	unknown
2021-01-14	20	2	known
2021-01-14	20	2	known
2021-01-15	20	2	known
2021-01-15	20	4	unknown
2021-01-15	20	2	known
2021-01-15	20	2	known
2021-01-15	20	2	known
2021-01-15	20	2	unknown
2021-01-15	20	2	unknown
2021-01-15	20	2	known
2021-01-15	20	2	unknown
2021-01-15	20	2	unknown
2021-01-16	20	2	known
2021-01-16	20	3	unknown
2021-01-16	20	2	known
2021-01-16	20	2	known
2021-01-16	20	3	known
2021-01-16	20	3	unknown
2021-01-16	20	3	unknown
2021-01-16	20	2	unknown
2021-01-16	20	3	unknown
2021-01-16	20	3	known
2021-01-16	20	2	known
2021-01-16	20	4	known
2021-01-16	20	2	known
2021-01-16	20	3	known
2021-01-16	20	2	known
2021-01-17	20	2	known
2021-01-17	20	2	unknown
2021-01-17	20	2	known
2021-01-17	20	2	unknown
2021-01-17	20	2	known
2021-01-17	20	2	unknown
2021-01-17	20	2	known
2021-01-17	20	2	unknown
2021-01-17	20	2	unknown
2021-01-17	20	2	known
2021-01-17	20	2	unknown
2021-01-18	20	2	known
2021-01-18	20	0	known
2021-01-18	20	1	unknown
2021-01-18	20	2	unknown
2021-01-18	20		known
2021-01-18	20	2	known
2021-01-18	20	2	known
2021-01-18	20	2	unknown
2021-01-18	20	2	known
2021-01-19	20	4	unknown
2021-01-19	20		unknown
2021-01-19	20	2	unknown
2021-01-19	20	2	unknown
2021-01-19	20	2	known
2021-01-19	20	1	known
2021-01-19	20		unknown
2021-01-20	20	3	known
2021-01-20	20	3	known
2021-01-20	20	3	unknown
2021-01-20	20	3	known
2021-01-20	20	3	known
2021-01-20	20	0	unknown
2021-01-20	20	3	unknown
2021-01-20	20		unknown
2021-01-20	20	3	unknown
2021-01-20	20	3	known
2021-01-20	20	5	known
2021-01-21	21	2	known
2021-01-21	21	2	known
2021-01-21	21	4	known
2021-01-21	21	5	unknown
2021-01-21	21	2	known
2021-01-21	21	2	known
2021-01-21	21	2	unknown
2021-01-21	21	2	unknown
2021-01-21	21	5	known
2021-01-21	21	4	known
2021-01-21	21	2	known
2021-01-22	21	4	known
2021-01-22	21	3	known
2021-01-22	21	3	known
2021-01-22	21	4	known
2021-01-22	21	5	known
2021-01-22	21	4	known
2021-01-22	21	4	known
2021-01-22	21	4	known
2021-01-22	21	4	known
2021-01-22	21	4	known
2021-01-22	21	3	known
2021-01-22	21	3	known
2021-01-22	21	5	known
2021-01-22	21	2	unknown
2021-01-23	21	4	known
2021-01-23	21	4	unknown
2021-01-23	21	3	unknown
2021-01-23	21	4	known
2021-01-23	21	3	known
2021-01-23	21	3	known
2021-01-23	21	4	known
2021-01-23	21	3	known
2021-01-23	21	3	unknown
2021-01-23	21	3	known
2021-01-23	21	3	known
2021-01-24	21	2	known
2021-01-24	21	2	known
2021-01-24	21	2	unknown
2021-01-25	21	2	known
2021-01-25	21	2	known
2021-01-25	21	2	known
2021-01-25	21	2	known
2021-01-25	21	2	known
2021-01-25	21	2	known
2021-01-25	21	2	known
2021-01-25	21	2	unknown
2021-01-25	21	2	known
2021-01-25	21	2	unknown
2021-01-25	21	2	unknown
2021-01-25	21	2	unknown
2021-01-25	21	2	unknown
2021-01-25	21	2	known
2021-01-26	21	3	known
2021-01-26	21	2	known
2021-01-26	21	2	unknown
2021-01-26	21	2	unknown
2021-01-26	21	2	unknown
2021-01-26	21	2	known
2021-01-26	21	7	known
2021-01-26	21	3	known
2021-01-26	21	4	unknown
2021-01-26	21	3	known
2021-01-26	21	2	unknown
2021-01-26	21	2	known
2021-01-26	21	3	known
2021-01-26	21	2	known
2021-01-27	21	2	unknown
2021-01-27	21	2	known
2021-01-27	21	2	unknown
2021-01-27	21	2	unknown
2021-01-27	21	2	known
2021-01-27	21	2	unknown
2021-01-27	21	3	known
2021-01-27	21	2	unknown
2021-01-27	21	2	known
2021-01-27	21	3	known
2021-01-27	21	4	known
2021-01-27	21	2	known
2021-01-28	22	2	known
2021-01-28	22	3	unknown
2021-01-28	22	3	unknown
2021-01-28	22	3	unknown
2021-01-28	22	2	known
2021-01-28	22	2	unknown
2021-01-28	22	2	known
2021-01-28	22	6	known
2021-01-28	22	2	unknown
2021-01-28	22	2	known
2021-01-28	22	2	known
2021-01-28	22	3	unknown
2021-01-28	22	2	known
2021-01-28	22	2	unknown
2021-01-28	22	4	known
2021-01-28	22	3	unknown
2021-01-28	22	3	known
2021-01-28	22	3	unknown
2021-01-28	22	2	unknown
2021-01-28	22	3	unknown
2021-01-29	22	2	known
2021-01-29	22	4	known
2021-01-29	22	2	unknown
2021-01-29	22	6	unknown
2021-01-29	22	4	known
2021-01-29	22	3	known
2021-01-29	22	3	unknown
2021-01-29	22	3	known
2021-01-29	22	3	known
2021-01-29	22	2	known
2021-01-29	22	2	known
2021-01-29	22	3	unknown
2021-01-29	22	3	known
2021-01-29	22	4	known
2021-01-29	22	2	known
2021-01-29	22	4	known
2021-01-29	22	5	unknown
2021-01-29	22	5	unknown
2021-01-29	22	4	known
2021-01-29	22	3	known
2021-01-29	22	2	unknown
2021-01-29	22	2	unknown
2021-01-29	22	4	known
2021-01-29	22	4	known
2021-01-29	22	2	unknown
2021-01-29	22	2	known
2021-01-30	22	3	unknown
2021-01-30	22	4	known
2021-01-30	22	3	known
2021-01-30	22	3	unknown
2021-01-30	22	3	known
2021-01-30	22	3	known
2021-01-30	22	3	known
2021-01-30	22	5	unknown
2021-01-30	22	4	known
2021-01-30	22	4	known
2021-01-30	22	3	known
2021-01-31	22	3	known
2021-01-31	22	2	unknown
2021-01-31	22	6	unknown
2021-01-31	22	3	known
2021-02-01	22	2	unknown
2021-02-01	22	2	unknown
2021-02-01	22	2	known
2021-02-01	22	3	known
2021-02-01	22	2	unknown
2021-02-01	22	2	known
2021-02-01	22	3	unknown
2021-02-02	22	2	known
2021-02-02	22	2	unknown
2021-02-02	22	3	known
2021-02-02	22	2	known
2021-02-02	22	1	unknown
2021-02-02	22	2	unknown
2021-02-02	22	2	known
2021-02-02	22	2	known
2021-02-02	22	2	unknown
2021-02-02	22	2	unknown
2021-02-03	22	2	known
2021-02-03	22	0	unknown
2021-02-03	22	1	unknown
2021-02-03	22	1	unknown
2021-02-03	22	1	known
2021-02-03	22	0	unknown
2021-02-03	22	0	unknown
2021-02-03	22	1	unknown
2021-02-03	22	1	unknown
2021-02-03	22	1	known
2021-02-03	22	1	unknown
2021-02-03	22	3	known
2021-02-03	22	1	known
2021-02-03	22	2	known
2021-02-03	22	1	unknown
2021-02-03	22	1	known
2021-02-03	22	4	known
2021-02-03	22	2	unknown
2021-02-03	22	1	unknown
2021-02-03	22	0	unknown
2021-02-03	22	0	unknown
2021-02-03	22	3	known
2021-02-03	22	3	unknown
2021-02-03	22	2	unknown
2021-02-03	22	2	known
2021-02-03	22	1	known
2021-02-03	22	0	unknown
2021-02-04	23	2	known
2021-02-04	23	3	unknown
2021-02-04	23	4	known
2021-02-04	23	3	unknown
2021-02-04	23	3	unknown
2021-02-04	23	2	unknown
2021-02-04	23	1	known
2021-02-04	23	2	unknown
2021-02-04	23	3	known
2021-02-04	23	2	unknown
2021-02-04	23	1	known
2021-02-05	23	3	known
2021-02-05	23	2	unknown
2021-02-05	23	2	unknown
2021-02-05	23	3	unknown
2021-02-05	23	4	known
2021-02-05	23	2	unknown
2021-02-05	23	2	unknown
2021-02-05	23	2	known
2021-02-05	23	4	unknown
2021-02-06	23	2	known
2021-02-06	23	2	unknown
2021-02-06	23	3	known
2021-02-06	23	2	known
2021-02-06	23	3	known
2021-02-06	23	2	known
2021-02-06	23	4	known
2021-02-06	23	2	unknown
2021-02-06	23	5	known
2021-02-06	23	3	known
2021-02-06	23	3	unknown
2021-02-06	23	3	unknown
2021-02-06	23	3	known
2021-02-06	23	2	unknown
2021-02-06	23	3	known
2021-02-06	23	2	known
2021-02-06	23	4	unknown
2021-02-06	23	3	unknown
2021-02-07	23	2	unknown
2021-02-07	23	2	known
2021-02-07	23	3	known
2021-02-07	23	0	unknown
2021-02-07	23	5	unknown
2021-02-07	23	2	unknown
2021-02-07	23	3	unknown
2021-02-07	23	0	unknown
2021-02-08	23	2	known
2021-02-08	23	23	known
2021-02-08	23	2	unknown
2021-02-08	23	2	unknown
2021-02-08	23	2	unknown
2021-02-08	23	2	unknown
2021-02-08	23	2	known
2021-02-08	23	2	known
2021-02-08	23	2	unknown
2021-02-08	23	2	unknown
2021-02-08	23	3	unknown
2021-02-08	23	3	known
2021-02-09	23	2	unknown
2021-02-09	23	3	unknown
2021-02-09	23	2	known
2021-02-09	23	2	unknown
2021-02-09	23	3	unknown
2021-02-10	23	3	known
2021-02-10	23	3	known
2021-02-10	23	2	known
2021-02-10	23	3	known
2021-02-10	23	4	unknown
2021-02-10	23	1	unknown
2021-02-10	23	2	unknown
2021-02-10	23	2	known
2021-02-10	23	4	unknown
2021-02-10	23	2	known
2021-02-10	23	2	known
2021-02-10	23	2	known
2021-02-11	24	2	unknown
2021-02-11	24	2	known
2021-02-11	24	2	known
2021-02-11	24	2	known
2021-02-11	24	2	unknown
2021-02-11	24	2	known
2021-02-11	24	2	unknown
2021-02-11	24	2	unknown
2021-02-11	24	2	unknown
2021-02-12	24	4	known
2021-02-12	24	4	known
2021-02-12	24	2	unknown
2021-02-12	24	2	unknown
2021-02-12	24	2	unknown
2021-02-12	24	2	known
2021-02-12	24	2	known
2021-02-12	24	2	known
2021-02-12	24	2	unknown
2021-02-12	24	2	unknown
2021-02-12	24	2	unknown
2021-02-12	24	4	known
2021-02-12	24	4	unknown
2021-02-12	24	4	unknown
2021-02-12	24	2	unknown
2021-02-12	24	4	unknown
2021-02-12	24	2	unknown
2021-02-12	24	3	known
2021-02-12	24	3	unknown
2021-02-12	24	2	unknown
2021-02-13	24	3	known
2021-02-13	24	3	unknown
2021-02-13	24	3	known
2021-02-13	24	0	known
2021-02-13	24	3	known
2021-02-13	24	4	unknown
2021-02-13	24	3	known
2021-02-13	24	3	known
2021-02-13	24	3	unknown
2021-02-13	24	3	known
2021-02-13	24	3	unknown
2021-02-13	24	3	unknown
2021-02-13	24	3	known
2021-02-13	24	3	known
2021-02-13	24	3	known
2021-02-13	24	3	known
2021-02-13	24	4	unknown
2021-02-14	24	4	known
2021-02-14	24	2	unknown
2021-02-14	24	2	known
2021-02-14	24	2	unknown
2021-02-14	24	2	unknown
2021-02-14	24	2	known
2021-02-14	24	2	unknown
2021-02-14	24	2	unknown
2021-02-15	24	3	known
2021-02-15	24	3	unknown
2021-02-15	24	3	unknown
2021-02-15	24	3	known
2021-02-15	24	2	known
2021-02-15	24	3	unknown
2021-02-15	24	3	known
2021-02-15	24	3	unknown
2021-02-16	24	2	known
2021-02-16	24	2	unknown
2021-02-16	24	2	unknown
2021-02-16	24	2	unknown
2021-02-16	24	3	known
2021-02-16	24	2	unknown
2021-02-16	24	2	unknown
2021-02-16	24	2	unknown
2021-02-16	24	2	unknown
2021-02-16	24	2	unknown
2021-02-16	24	2	known
2021-02-16	24	2	unknown
2021-02-16	24	2	unknown
2021-02-16	24	2	known
2021-02-17	24	1	unknown
2021-02-17	24	1	known
2021-02-17	24	3	unknown
2021-02-17	24	1	known
2021-02-17	24	2	known
2021-02-17	24	1	known
2021-02-17	24	0	unknown
2021-02-17	24	2	known
2021-02-17	24	2	known
2021-02-17	24	2	known
2021-02-17	24	0	unknown
2021-02-17	24	7	unknown
2021-02-17	24	2	known
2021-02-17	24	2	known
2021-02-17	24	1	unknown
2021-02-17	24	3	unknown
2021-02-17	24	2	known
2021-02-17	24	1	unknown
2021-02-17	24	2	unknown
2021-02-17	24	2	known
2021-02-17	24	1	unknown
2021-02-17	24	1	known
2021-02-17	24	1	unknown
2021-02-17	24	3	known
2021-02-17	24	2	known
2021-02-18	25	2	unknown
2021-02-18	25	2	known
2021-02-18	25	1	known
2021-02-18	25	3	known
2021-02-18	25	3	unknown
2021-02-18	25	2	unknown
2021-02-18	25	2	known
2021-02-18	25	3	known
2021-02-18	25	2	known
2021-02-18	25	2	unknown
2021-02-18	25	3	unknown
2021-02-18	25	2	unknown
2021-02-18	25	2	unknown
2021-02-18	25	2	unknown
2021-02-18	25	3	known
2021-02-18	25	2	known
2021-02-18	25	3	unknown
2021-02-18	25	3	known
2021-02-18	25	3	known
2021-02-18	25	2	unknown
2021-02-18	25	2	known
2021-02-18	25	2	unknown
2021-02-18	25	3	known
2021-02-18	25	3	unknown
2021-02-18	25	5	unknown
2021-02-18	25	2	unknown
2021-02-18	25	1	unknown
2021-02-18	25	2	unknown
2021-02-18	25	1	unknown
2021-02-18	25	2	known
2021-02-18	25	2	known
2021-02-18	25	3	known
2021-02-19	25	4	known
2021-02-19	25	4	known
2021-02-19	25	2	unknown
2021-02-19	25	2	known
2021-02-19	25	2	known
2021-02-19	25	2	known
2021-02-19	25	2	unknown
2021-02-19	25	2	known
2021-02-19	25	2	known
2021-02-19	25	4	known
2021-02-19	25	2	known
2021-02-19	25	7	known
2021-02-19	25	8	unknown
2021-02-19	25	2	unknown
2021-02-19	25	4	known
2021-02-19	25	2	known
2021-02-19	25	4	known
2021-02-19	25	4	known
2021-02-19	25	2	known
2021-02-19	25	2	known
2021-02-19	25	2	known
2021-02-19	25	2	known
2021-02-19	25	2	known
2021-02-19	25	4	known
2021-02-19	25	0	known
2021-02-19	25	4	unknown
2021-02-19	25	2	unknown
2021-02-19	25	2	known
2021-02-20	25	3	known
2021-02-20	25	2	unknown
2021-02-20	25	3	unknown
2021-02-20	25	3	known
2021-02-20	25	2	known
2021-02-20	25	2	unknown
2021-02-20	25	2	known
2021-02-20	25	4	known
2021-02-20	25	3	unknown
2021-02-20	25	3	unknown
2021-02-20	25	3	known
2021-02-20	25	3	known
2021-02-20	25	3	unknown
2021-02-20	25	3	known
2021-02-20	25	3	known
2021-02-20	25	3	unknown
2021-02-20	25	3	known
2021-02-20	25	3	unknown
2021-02-20	25	3	known
2021-02-20	25	3	unknown
2021-02-20	25	3	known
2021-02-20	25	3	known
2021-02-20	25	3	unknown
2021-02-20	25	3	unknown
2021-02-21	25	4	unknown
2021-02-21	25	2	unknown
2021-02-21	25	8	unknown
2021-02-21	25	2	unknown
2021-02-21	25	9	unknown
2021-02-21	25	6	unknown
2021-02-21	25	5	unknown
2021-02-21	25	3	unknown
2021-02-21	25	2	unknown
2021-02-21	25	2	unknown
2021-02-21	25	4	known
2021-02-21	25	2	unknown
2021-02-21	25	2	unknown
2021-02-21	25	2	unknown
2021-02-21	25	3	unknown
2021-02-21	25	2	unknown
2021-02-21	25	2	unknown
2021-02-21	25	2	known
2021-02-21	25	2	unknown
2021-02-21	25	2	unknown
2021-02-21	25	7	unknown
2021-02-21	25	3	unknown
2021-02-21	25	2	unknown
2021-02-22	25	2	unknown
2021-02-22	25	8	unknown
2021-02-22	25	4	known
2021-02-22	25	2	unknown
2021-02-22	25	8	unknown
2021-02-22	25	8	unknown
2021-02-22	25	2	known
2021-02-22	25	2	unknown
2021-02-22	25	2	unknown
2021-02-22	25	2	known
2021-02-22	25	8	unknown
2021-02-22	25	2	known
2021-02-22	25	2	unknown
2021-02-22	25	2	unknown
2021-02-22	25	2	unknown
2021-02-22	25	2	unknown
2021-02-22	25	2	unknown
2021-02-22	25	2	unknown
2021-02-22	25	2	unknown
2021-02-22	25	2	unknown
2021-02-22	25	2	unknown
2021-02-22	25	5	unknown
2021-02-22	25	8	unknown
2021-02-23	25	3	unknown
2021-02-23	25	3	unknown
2021-02-23	25	3	known
2021-02-23	25	2	unknown
2021-02-23	25	4	known
2021-02-23	25	2	unknown
2021-02-23	25	4	known
2021-02-23	25	2	unknown
2021-02-23	25	2	known
2021-02-23	25	3	known
2021-02-23	25	3	unknown
2021-02-23	25	3	unknown
2021-02-23	25	4	known
2021-02-23	25	4	unknown
2021-02-23	25	2	unknown
2021-02-23	25	0	known
2021-02-23	25	3	known
2021-02-23	25	2	known
2021-02-23	25	3	unknown
2021-02-23	25	2	known
2021-02-23	25	2	unknown
2021-02-23	25	4	unknown
2021-02-23	25	2	unknown
2021-02-23	25	2	unknown
2021-02-23	25	2	unknown
2021-02-23	25	2	unknown
2021-02-23	25	3	unknown
2021-02-23	25	3	known
2021-02-23	25	3	known
2021-02-24	25	2	unknown
2021-02-24	25	2	unknown
2021-02-24	25	2	unknown
2021-02-24	25	2	unknown
2021-02-24	25	4	known
2021-02-24	25	3	unknown
2021-02-24	25	2	unknown
2021-02-24	25	4	known
2021-02-24	25	2	unknown
2021-02-24	25	3	unknown
2021-02-24	25	2	known
2021-02-24	25	2	known
2021-02-24	25	2	unknown
2021-02-24	25	4	known
2021-02-24	25	2	unknown
2021-02-24	25	3	unknown
2021-02-24	25	2	known
2021-02-25	26	4	unknown
2021-02-25	26	2	unknown
2021-02-25	26	2	known
2021-02-25	26	3	unknown
2021-02-25	26	1	unknown
2021-02-25	26	3	unknown
2021-02-25	26	3	unknown
2021-02-25	26	2	unknown
2021-02-25	26	3	unknown
2021-02-25	26		known
2021-02-25	26	2	known
2021-02-25	26	3	known
2021-02-25	26	3	unknown
2021-02-25	26	2	known
2021-02-25	26	3	unknown
2021-02-25	26	6	known
2021-02-25	26	2	known
2021-02-25	26	2	unknown
2021-02-25	26	8	known
2021-02-25	26	2	known
2021-02-25	26	3	unknown
2021-02-25	26	3	known
2021-02-25	26	3	known
2021-02-25	26	2	unknown
2021-02-25	26	3	known
2021-02-25	26	1	unknown
2021-02-26	26	5	unknown
2021-02-26	26	4	unknown
2021-02-26	26	4	known
2021-02-26	26	4	known
2021-02-26	26	4	unknown
2021-02-26	26	3	known
2021-02-26	26	4	unknown
2021-02-26	26	4	known
2021-02-26	26	4	known
2021-02-26	26	3	unknown
2021-02-26	26	4	known
2021-02-26	26	2	unknown
2021-02-26	26	2	unknown
2021-02-26	26	2	known
2021-02-26	26	5	unknown
2021-02-26	26	4	unknown
2021-02-26	26	4	unknown
2021-02-26	26	4	unknown
2021-02-26	26	6	unknown
2021-02-26	26	5	known
2021-02-26	26	2	unknown
2021-02-26	26	5	unknown
2021-02-26	26	4	unknown
2021-02-26	26	3	unknown
2021-02-26	26	5	unknown
2021-02-26	26	2	known
2021-02-26	26	4	known
2021-02-26	26	4	unknown
2021-02-26	26	2	unknown
2021-02-26	26	2	known
2021-02-26	26	6	known
2021-02-26	26	2	known
2021-02-26	26	6	unknown
2021-02-26	26	2	unknown
2021-02-26	26	4	unknown
2021-02-26	26	3	unknown
2021-02-27	26	3	unknown
2021-02-27	26	4	unknown
2021-02-27	26	2	known
2021-02-27	26	4	known
2021-02-27	26	5	unknown
2021-02-27	26	3	unknown
2021-02-27	26	4	known
2021-02-27	26	4	known
2021-02-27	26	5	known
2021-02-27	26	4	unknown
2021-02-27	26	4	unknown
2021-02-27	26	4	unknown
2021-02-27	26	4	unknown
2021-02-27	26	3	known
2021-02-27	26	3	unknown
2021-02-27	26	5	known
2021-02-27	26	5	unknown
2021-02-27	26	3	unknown
2021-02-27	26	4	known
2021-02-27	26	4	unknown
2021-02-27	26	3	unknown
2021-02-27	26	3	known
2021-02-27	26	4	known
2021-02-27	26	5	known
2021-02-27	26	3	known
2021-02-27	26	3	unknown
2021-02-27	26	3	unknown
2021-02-27	26	2	known
2021-02-27	26	3	known
2021-02-27	26	3	unknown
2021-02-27	26	3	known
2021-02-27	26	3	unknown
2021-02-27	26	3	unknown
2021-02-27	26	4	unknown
2021-02-27	26	4	known
2021-02-27	26	3	unknown
2021-02-27	26	4	unknown
2021-02-27	26	3	known
2021-02-27	26	4	unknown
2021-02-27	26	4	known
2021-02-27	26	4	known
2021-02-27	26	3	known
2021-02-28	26	2	unknown
2021-02-28	26	3	known
2021-02-28	26	3	unknown
2021-02-28	26	2	unknown
2021-02-28	26	2	unknown
2021-02-28	26	3	known
2021-02-28	26	2	unknown
2021-02-28	26	2	unknown
2021-02-28	26	2	unknown
2021-02-28	26	2	unknown
2021-02-28	26	4	unknown
2021-02-28	26	2	unknown
2021-02-28	26	2	unknown
2021-02-28	26	2	unknown
2021-02-28	26	2	unknown
2021-02-28	26	2	known
2021-02-28	26	2	known
2021-02-28	26	2	unknown
2021-02-28	26	2	unknown
2021-02-28	26	2	unknown
2021-02-28	26	3	known
2021-02-28	26	2	unknown
2021-02-28	26	2	known
2021-03-01	26	3	known
2021-03-01	26	2	unknown
2021-03-01	26	2	known
2021-03-01	26	3	known
2021-03-01	26	4	unknown
2021-03-01	26	3	unknown
2021-03-01	26	2	unknown
2021-03-01	26	5	known
2021-03-01	26	2	unknown
2021-03-01	26	3	unknown
2021-03-01	26	2	known
2021-03-01	26	2	known
2021-03-01	26	2	known
2021-03-01	26	2	known
2021-03-01	26	2	unknown
2021-03-01	26	2	unknown
2021-03-01	26	2	known
2021-03-01	26	4	known
2021-03-01	26	4	unknown
2021-03-01	26	3	unknown
2021-03-01	26	2	unknown
2021-03-01	26	3	unknown
2021-03-01	26	2	known
2021-03-01	26	0	known
2021-03-01	26	5	unknown
2021-03-01	26	4	known
2021-03-01	26	3	unknown
2021-03-01	26	2	known
2021-03-01	26	2	unknown
2021-03-01	26	4	unknown
2021-03-01	26	2	known
2021-03-01	26	4	known
2021-03-01	26	2	known
2021-03-01	26	3	known
2021-03-01	26	0	known
2021-03-01	26	4	unknown
2021-03-01	26	2	unknown
2021-03-01	26	2	known
2021-03-01	26	2	unknown
2021-03-02	26	4	unknown
2021-03-02	26	1	unknown
2021-03-02	26	3	known
2021-03-02	26	0	known
2021-03-02	26	1	unknown
2021-03-02	26	3	known
2021-03-02	26	4	known
2021-03-02	26	5	known
2021-03-02	26	3	unknown
2021-03-02	26	0	known
2021-03-02	26	2	unknown
2021-03-02	26	3	unknown
2021-03-02	26	3	unknown
2021-03-02	26	3	unknown
2021-03-02	26	0	known
2021-03-02	26	3	known
2021-03-02	26	0	known
2021-03-02	26	0	known
2021-03-02	26	0	known
2021-03-02	26	4	unknown
2021-03-03	26	2	unknown
2021-03-03	26	2	unknown
2021-03-03	26	3	unknown
2021-03-03	26	3	unknown
2021-03-03	26	2	unknown
2021-03-03	26	3	known
2021-03-03	26	3	known
2021-03-03	26	3	unknown
2021-03-03	26	3	unknown
2021-03-03	26	3	known
2021-03-03	26	3	known
2021-03-03	26	0	unknown
2021-03-03	26	3	unknown
2021-03-03	26	3	known
2021-03-03	26	3	known
2021-03-03	26	7	unknown
2021-03-03	26	3	unknown
2021-03-03	26	2	known
2021-03-03	26	3	unknown
2021-03-03	26	3	known
2021-03-03	26	3	unknown
2021-03-03	26	2	unknown
2021-03-03	26	3	known
2021-03-03	26	2	known
2021-03-03	26	3	unknown
2021-03-03	26	2	unknown
2021-03-03	26	5	unknown
2021-03-03	26	3	known
2021-03-04	27	2	unknown
2021-03-04	27	4	unknown
2021-03-04	27	4	known
2021-03-04	27	2	known
2021-03-04	27	2	unknown
2021-03-04	27	2	known
2021-03-04	27	2	known
2021-03-04	27	2	unknown
2021-03-04	27	2	unknown
2021-03-04	27	2	known
2021-03-04	27	4	unknown
2021-03-04	27	2	unknown
2021-03-04	27	2	unknown
2021-03-04	27	2	known
2021-03-04	27	4	unknown
2021-03-04	27	4	unknown
2021-03-04	27		known
2021-03-04	27	4	unknown
2021-03-04	27	2	known
2021-03-04	27	10	unknown
2021-03-04	27	2	known
2021-03-04	27	4	unknown
2021-03-04	27	2	unknown
2021-03-05	27	5	unknown
2021-03-05	27	3	unknown
2021-03-05	27	3	unknown
2021-03-05	27	3	known
2021-03-05	27	1	known
2021-03-05	27	1	known
2021-03-05	27	1	unknown
2021-03-05	27	5	unknown
2021-03-05	27	3	unknown
2021-03-05	27	1	unknown
2021-03-05	27	6	known
2021-03-05	27	3	unknown
2021-03-05	27		known
2021-03-05	27	3	unknown
2021-03-05	27	1	unknown
2021-03-05	27	3	unknown
2021-03-05	27	1	known
2021-03-05	27	3	unknown
2021-03-05	27	3	unknown
2021-03-05	27	5	known
2021-03-05	27	3	known
2021-03-05	27		known
2021-03-05	27	1	unknown
2021-03-05	27	1	known
2021-03-05	27	1	known
2021-03-05	27	1	known
2021-03-05	27	6	known
2021-03-05	27	6	known
2021-03-05	27	3	unknown
2021-03-05	27		known
2021-03-05	27	1	unknown
2021-03-05	27	12	unknown
2021-03-05	27	3	unknown
2021-03-05	27	3	known
2021-03-05	27	3	unknown
2021-03-05	27	1	known
2021-03-05	27	2	known
2021-03-05	27	3	unknown
2021-03-05	27	1	known
2021-03-06	27	7	unknown
2021-03-06	27	6	known
2021-03-06	27	7	known
2021-03-06	27		known
2021-03-06	27	6	known
2021-03-06	27	7	known
2021-03-06	27	2	known
2021-03-06	27	6	known
2021-03-06	27	2	unknown
2021-03-06	27	6	known
2021-03-06	27	5	unknown
2021-03-06	27	10	known
2021-03-06	27	14	unknown
2021-03-06	27	2	unknown
2021-03-06	27	6	known
2021-03-06	27	7	unknown
2021-03-06	27		known
2021-03-06	27	6	known
2021-03-06	27	7	known
2021-03-06	27	6	unknown
2021-03-06	27	6	known
2021-03-06	27	5	unknown
2021-03-07	27	6	unknown
2021-03-07	27	5	known
2021-03-07	27		unknown
2021-03-07	27	6	known
2021-03-07	27	3	known
2021-03-07	27	1	unknown
2021-03-07	27	7	known
2021-03-07	27	7	known
2021-03-07	27	8	known
2021-03-07	27	6	known
2021-03-07	27	5	unknown
2021-03-07	27	8	known
2021-03-07	27	4	unknown
2021-03-07	27	5	unknown
2021-03-07	27	4	known
2021-03-07	27	7	known
2021-03-07	27	6	unknown
2021-03-07	27	6	unknown
2021-03-08	27	5	unknown
2021-03-08	27		unknown
2021-03-08	27	5	unknown
2021-03-08	27	7	known
2021-03-08	27	4	unknown
2021-03-08	27	5	known
2021-03-08	27	5	unknown
2021-03-08	27	3	known
2021-03-08	27	2	unknown
2021-03-09	27	4	unknown
2021-03-09	27	5	unknown
2021-03-09	27		known
2021-03-09	27	3	unknown
2021-03-09	27	5	known
2021-03-09	27	4	known
2021-03-09	27	4	known
2021-03-09	27	2	unknown
2021-03-09	27	5	known
2021-03-09	27	2	known
2021-03-10	27	3	unknown
2021-03-10	27	3	known
2021-03-10	27	2	known
2021-03-10	27	3	unknown
2021-03-10	27	3	unknown
2021-03-10	27		unknown
2021-03-10	27	2	unknown
2021-03-10	27	3	unknown
2021-03-10	27	2	unknown
2021-03-10	27	2	known
2021-03-11	28	6	unknown
2021-03-11	28	6	known
2021-03-11	28	6	unknown
2021-03-11	28	5	known
2021-03-11	28	2	known
2021-03-12	28	3	known
2021-03-12	28	3	known
2021-03-12	28	3	known
2021-03-12	28	3	unknown
2021-03-12	28	4	known
2021-03-12	28	4	unknown
2021-03-13	28	3	unknown
2021-03-13	28	3	unknown
2021-03-13	28	7	known
2021-03-13	28	3	unknown
2021-03-13	28	3	unknown
2021-03-14	28	3	unknown
2021-03-14	28	3	unknown
2021-03-14	28	3	known
2021-03-15	28	2	unknown
2021-03-15	28	2	unknown
2021-03-15	28	2	unknown
2021-03-15	28	2	known
2021-03-15	28	1	known
2021-03-15	28	2	known
2021-03-16	28	1	unknown
2021-03-17	28	0	known
2021-03-17	28	1	known
2021-03-17	28	1	known
2021-03-18	29	3	unknown
2021-03-19	29	5	known
2021-03-19	29	2	known
2021-03-19	29	2	unknown
2021-03-20	29	2	known
2021-03-21	29	1	known
2021-03-21	29	1	unknown
2021-03-23	29	2	known
2021-03-24	29	2	known
2021-03-24	29	2	known
2021-03-25	30	2	known
2021-03-26	30	4	unknown
2021-03-27	30	3	unknown
2021-03-27	30	3	unknown
2021-03-29	30	2	known
2021-03-30	30	2	known
2021-03-30	30	2	unknown
2021-03-31	30	2	unknown
2021-04-01	31	3	unknown
2021-04-01	31	2	known
2021-04-01	31	3	unknown
2021-04-02	31	3	known

## Sheet: Weekly average
	Week	Date	Average	Known source %	Number of classes		Known	Unknown	total
	1	2020-09-03			1		0	1	1
	2	2020-09-11	0	1	1		1	0	1
	3	2020-09-17	1.875	0.75	8		6	2	8
	4	2020-09-24	1.75	0.75	8		6	2	8
	5	2020-10-02	4.46667	0.8	15		12	3	15
	6	2020-10-08	8.33333	0.571429	42		24	18	42
	7	2020-10-15	7	0.38	50		19	31	50
	8	2020-10-22	8.21111	0.336957	92		31	61	92
	9	2020-10-29	8.5625	0.283582	67		19	48	67
	10	2020-11-05	9.62222	0.133333	45		6	39	45
	11	2020-11-12	7.10714	0.210526	57		12	45	57
	12	2020-11-19	6.85135	0.204819	83		17	66	83
	13	2020-11-26	5.05085	0.288136	59		17	42	59
	14	2020-12-03	4.58252	0.533981	103		55	48	103
	15	2020-12-10	3.24638	0.388889	72		28	44	72
	16	2020-12-17	2.66667	0.439024	82		36	46	82
	17	2020-12-24	3.28571	0.631579	38		24	14	38
	18	2020-12-31	5.53846	0.846154	13		11	2	13
	19	2021-01-08	3.04545	0.577778	45		26	19	45
	20	2021-01-14	2.28358	0.56338	71		40	31	71
	21	2021-01-21	2.81013	0.708861	79		56	23	79
	22	2021-01-28	2.47619	0.52381	105		55	50	105
	23	2021-02-04	2.76	0.466667	75		35	40	75
	24	2021-02-11	2.34653	0.465347	101		47	54	101
	25	2021-02-18	2.86364	0.420455	176		74	102	176
	26	2021-02-25	2.96244	0.434579	214		93	121	214
	27	2021-03-04	3.97521	0.48855	131		64	67	131
	28	2021-03-11	3	0.517241	29		15	14	29
	29	2021-03-18	2.2	0.7	10		7	3	10
	30	2021-03-25	2.5	0.375	8		3	5	8
	31	2021-04-01	2.75	0.5	4		2	2	4
