# Supplementary material for: Effect of an enhanced public health contact tracing intervention on the secondary transmission of SARS-CoV-2 in educational settings: The four-way decomposition analysis
Source: eLife. 2024 Feb 28;13:e85802. doi: 10.7554/eLife.85802 (PMC10901504; doi:10.7554/eLife.85802)
Supplement: Supplementary file 4. [file elife-85802-supp4.xlsx]

## Sheet: Daily cases
Date of diagnosis	Age	Case
01/09/2020	0-5	0
01/09/2020	6-10	0
01/09/2020	11-13	0
01/09/2020	14-19	0
02/09/2020	0-5	0
02/09/2020	6-10	0
02/09/2020	11-13	0
02/09/2020	14-19	4
03/09/2020	0-5	0
03/09/2020	6-10	0
03/09/2020	11-13	1
03/09/2020	14-19	0
04/09/2020	0-5	1
04/09/2020	6-10	2
04/09/2020	11-13	0
04/09/2020	14-19	1
05/09/2020	0-5	3
05/09/2020	6-10	2
05/09/2020	11-13	0
05/09/2020	14-19	2
06/09/2020	0-5	0
06/09/2020	6-10	2
06/09/2020	11-13	2
06/09/2020	14-19	2
07/09/2020	0-5	0
07/09/2020	6-10	0
07/09/2020	11-13	1
07/09/2020	14-19	2
08/09/2020	0-5	0
08/09/2020	6-10	2
08/09/2020	11-13	0
08/09/2020	14-19	1
09/09/2020	0-5	0
09/09/2020	6-10	1
09/09/2020	11-13	0
09/09/2020	14-19	0
11/09/2020	0-5	4
11/09/2020	6-10	0
11/09/2020	11-13	0
11/09/2020	14-19	2
12/09/2020	0-5	2
12/09/2020	6-10	0
12/09/2020	11-13	1
12/09/2020	14-19	1
13/09/2020	0-5	1
13/09/2020	6-10	4
13/09/2020	11-13	0
13/09/2020	14-19	0
14/09/2020	0-5	0
14/09/2020	6-10	1
14/09/2020	11-13	0
14/09/2020	14-19	0
16/09/2020	0-5	2
16/09/2020	6-10	1
16/09/2020	11-13	2
16/09/2020	14-19	2
17/09/2020	0-5	0
17/09/2020	6-10	2
17/09/2020	11-13	0
17/09/2020	14-19	4
18/09/2020	0-5	0
18/09/2020	6-10	1
18/09/2020	11-13	2
18/09/2020	14-19	1
19/09/2020	0-5	0
19/09/2020	6-10	0
19/09/2020	11-13	1
19/09/2020	14-19	0
20/09/2020	0-5	0
20/09/2020	6-10	1
20/09/2020	11-13	0
20/09/2020	14-19	3
22/09/2020	0-5	0
22/09/2020	6-10	0
22/09/2020	11-13	0
22/09/2020	14-19	2
23/09/2020	0-5	0
23/09/2020	6-10	0
23/09/2020	11-13	0
23/09/2020	14-19	1
24/09/2020	0-5	0
24/09/2020	6-10	1
24/09/2020	11-13	1
24/09/2020	14-19	0
25/09/2020	0-5	1
25/09/2020	6-10	3
25/09/2020	11-13	0
25/09/2020	14-19	1
26/09/2020	0-5	0
26/09/2020	6-10	0
26/09/2020	11-13	0
26/09/2020	14-19	3
27/09/2020	0-5	0
27/09/2020	6-10	2
27/09/2020	11-13	1
27/09/2020	14-19	1
28/09/2020	0-5	0
28/09/2020	6-10	0
28/09/2020	11-13	0
28/09/2020	14-19	1
29/09/2020	0-5	0
29/09/2020	6-10	1
29/09/2020	11-13	3
29/09/2020	14-19	6
30/09/2020	0-5	1
30/09/2020	6-10	0
30/09/2020	11-13	1
30/09/2020	14-19	1
01/10/2020	0-5	0
01/10/2020	6-10	0
01/10/2020	11-13	0
01/10/2020	14-19	3
02/10/2020	0-5	1
02/10/2020	6-10	0
02/10/2020	11-13	0
02/10/2020	14-19	4
03/10/2020	0-5	0
03/10/2020	6-10	3
03/10/2020	11-13	1
03/10/2020	14-19	0
04/10/2020	0-5	0
04/10/2020	6-10	2
04/10/2020	11-13	2
04/10/2020	14-19	1
06/10/2020	0-5	0
06/10/2020	6-10	1
06/10/2020	11-13	0
06/10/2020	14-19	4
07/10/2020	0-5	2
07/10/2020	6-10	0
07/10/2020	11-13	1
07/10/2020	14-19	2
08/10/2020	0-5	2
08/10/2020	6-10	0
08/10/2020	11-13	0
08/10/2020	14-19	4
09/10/2020	0-5	0
09/10/2020	6-10	0
09/10/2020	11-13	0
09/10/2020	14-19	3
10/10/2020	0-5	2
10/10/2020	6-10	2
10/10/2020	11-13	1
10/10/2020	14-19	3
11/10/2020	0-5	0
11/10/2020	6-10	0
11/10/2020	11-13	0
11/10/2020	14-19	6
12/10/2020	0-5	1
12/10/2020	6-10	1
12/10/2020	11-13	1
12/10/2020	14-19	5
13/10/2020	0-5	1
13/10/2020	6-10	3
13/10/2020	11-13	6
13/10/2020	14-19	4
14/10/2020	0-5	3
14/10/2020	6-10	1
14/10/2020	11-13	6
14/10/2020	14-19	9
15/10/2020	0-5	1
15/10/2020	6-10	4
15/10/2020	11-13	2
15/10/2020	14-19	8
16/10/2020	0-5	1
16/10/2020	6-10	1
16/10/2020	11-13	4
16/10/2020	14-19	8
17/10/2020	0-5	1
17/10/2020	6-10	0
17/10/2020	11-13	1
17/10/2020	14-19	11
18/10/2020	0-5	0
18/10/2020	6-10	0
18/10/2020	11-13	1
18/10/2020	14-19	7
19/10/2020	0-5	0
19/10/2020	6-10	0
19/10/2020	11-13	1
19/10/2020	14-19	9
20/10/2020	0-5	0
20/10/2020	6-10	3
20/10/2020	11-13	5
20/10/2020	14-19	8
21/10/2020	0-5	0
21/10/2020	6-10	0
21/10/2020	11-13	4
21/10/2020	14-19	7
22/10/2020	0-5	0
22/10/2020	6-10	2
22/10/2020	11-13	9
22/10/2020	14-19	14
23/10/2020	0-5	3
23/10/2020	6-10	5
23/10/2020	11-13	7
23/10/2020	14-19	28
24/10/2020	0-5	1
24/10/2020	6-10	3
24/10/2020	11-13	14
24/10/2020	14-19	14
25/10/2020	0-5	3
25/10/2020	6-10	5
25/10/2020	11-13	3
25/10/2020	14-19	20
26/10/2020	0-5	6
26/10/2020	6-10	0
26/10/2020	11-13	8
26/10/2020	14-19	31
27/10/2020	0-5	2
27/10/2020	6-10	3
27/10/2020	11-13	1
27/10/2020	14-19	27
28/10/2020	0-5	2
28/10/2020	6-10	3
28/10/2020	11-13	5
28/10/2020	14-19	29
29/10/2020	0-5	1
29/10/2020	6-10	10
29/10/2020	11-13	10
29/10/2020	14-19	31
30/10/2020	0-5	3
30/10/2020	6-10	7
30/10/2020	11-13	11
30/10/2020	14-19	19
31/10/2020	0-5	9
31/10/2020	6-10	10
31/10/2020	11-13	8
31/10/2020	14-19	33
01/11/2020	0-5	1
01/11/2020	6-10	16
01/11/2020	11-13	11
01/11/2020	14-19	30
02/11/2020	0-5	4
02/11/2020	6-10	7
02/11/2020	11-13	8
02/11/2020	14-19	27
03/11/2020	0-5	2
03/11/2020	6-10	5
03/11/2020	11-13	6
03/11/2020	14-19	31
04/11/2020	0-5	6
04/11/2020	6-10	6
04/11/2020	11-13	6
04/11/2020	14-19	39
05/11/2020	0-5	4
05/11/2020	6-10	5
05/11/2020	11-13	5
05/11/2020	14-19	37
06/11/2020	0-5	2
06/11/2020	6-10	12
06/11/2020	11-13	14
06/11/2020	14-19	19
07/11/2020	0-5	10
07/11/2020	6-10	13
07/11/2020	11-13	16
07/11/2020	14-19	19
08/11/2020	0-5	6
08/11/2020	6-10	8
08/11/2020	11-13	7
08/11/2020	14-19	19
09/11/2020	0-5	8
09/11/2020	6-10	13
09/11/2020	11-13	20
09/11/2020	14-19	14
10/11/2020	0-5	0
10/11/2020	6-10	15
10/11/2020	11-13	19
10/11/2020	14-19	15
11/11/2020	0-5	6
11/11/2020	6-10	8
11/11/2020	11-13	9
11/11/2020	14-19	25
12/11/2020	0-5	6
12/11/2020	6-10	13
12/11/2020	11-13	7
12/11/2020	14-19	25
13/11/2020	0-5	2
13/11/2020	6-10	8
13/11/2020	11-13	7
13/11/2020	14-19	22
14/11/2020	0-5	2
14/11/2020	6-10	5
14/11/2020	11-13	6
14/11/2020	14-19	22
15/11/2020	0-5	7
15/11/2020	6-10	14
15/11/2020	11-13	7
15/11/2020	14-19	12
16/11/2020	0-5	3
16/11/2020	6-10	4
16/11/2020	11-13	7
16/11/2020	14-19	24
17/11/2020	0-5	3
17/11/2020	6-10	7
17/11/2020	11-13	8
17/11/2020	14-19	27
18/11/2020	0-5	2
18/11/2020	6-10	10
18/11/2020	11-13	7
18/11/2020	14-19	21
19/11/2020	0-5	2
19/11/2020	6-10	8
19/11/2020	11-13	8
19/11/2020	14-19	27
20/11/2020	0-5	7
20/11/2020	6-10	8
20/11/2020	11-13	7
20/11/2020	14-19	16
21/11/2020	0-5	5
21/11/2020	6-10	11
21/11/2020	11-13	9
21/11/2020	14-19	20
22/11/2020	0-5	4
22/11/2020	6-10	5
22/11/2020	11-13	10
22/11/2020	14-19	26
23/11/2020	0-5	9
23/11/2020	6-10	12
23/11/2020	11-13	3
23/11/2020	14-19	12
24/11/2020	0-5	7
24/11/2020	6-10	3
24/11/2020	11-13	3
24/11/2020	14-19	17
25/11/2020	0-5	6
25/11/2020	6-10	8
25/11/2020	11-13	6
25/11/2020	14-19	11
26/11/2020	0-5	12
26/11/2020	6-10	10
26/11/2020	11-13	2
26/11/2020	14-19	9
27/11/2020	0-5	3
27/11/2020	6-10	5
27/11/2020	11-13	12
27/11/2020	14-19	14
28/11/2020	0-5	3
28/11/2020	6-10	7
28/11/2020	11-13	7
28/11/2020	14-19	11
29/11/2020	0-5	3
29/11/2020	6-10	4
29/11/2020	11-13	3
29/11/2020	14-19	16
30/11/2020	0-5	4
30/11/2020	6-10	7
30/11/2020	11-13	3
30/11/2020	14-19	10
01/12/2020	0-5	4
01/12/2020	6-10	12
01/12/2020	11-13	7
01/12/2020	14-19	18
02/12/2020	0-5	12
02/12/2020	6-10	12
02/12/2020	11-13	7
02/12/2020	14-19	23
03/12/2020	0-5	7
03/12/2020	6-10	14
03/12/2020	11-13	7
03/12/2020	14-19	21
04/12/2020	0-5	14
04/12/2020	6-10	41
04/12/2020	11-13	14
04/12/2020	14-19	14
05/12/2020	0-5	6
05/12/2020	6-10	21
05/12/2020	11-13	6
05/12/2020	14-19	9
06/12/2020	0-5	1
06/12/2020	6-10	12
06/12/2020	11-13	1
06/12/2020	14-19	8
07/12/2020	0-5	3
07/12/2020	6-10	25
07/12/2020	11-13	16
07/12/2020	14-19	8
08/12/2020	0-5	7
08/12/2020	6-10	10
08/12/2020	11-13	5
08/12/2020	14-19	8
09/12/2020	0-5	16
09/12/2020	6-10	11
09/12/2020	11-13	12
09/12/2020	14-19	9
10/12/2020	0-5	4
10/12/2020	6-10	3
10/12/2020	11-13	8
10/12/2020	14-19	3
11/12/2020	0-5	5
11/12/2020	6-10	15
11/12/2020	11-13	7
11/12/2020	14-19	11
12/12/2020	0-5	7
12/12/2020	6-10	12
12/12/2020	11-13	5
12/12/2020	14-19	11
13/12/2020	0-5	2
13/12/2020	6-10	8
13/12/2020	11-13	11
13/12/2020	14-19	12
14/12/2020	0-5	7
14/12/2020	6-10	15
14/12/2020	11-13	6
14/12/2020	14-19	13
15/12/2020	0-5	5
15/12/2020	6-10	4
15/12/2020	11-13	9
15/12/2020	14-19	18
16/12/2020	0-5	4
16/12/2020	6-10	8
16/12/2020	11-13	7
16/12/2020	14-19	9
17/12/2020	0-5	8
17/12/2020	6-10	6
17/12/2020	11-13	13
17/12/2020	14-19	10
18/12/2020	0-5	4
18/12/2020	6-10	5
18/12/2020	11-13	6
18/12/2020	14-19	11
19/12/2020	0-5	9
19/12/2020	6-10	4
19/12/2020	11-13	11
19/12/2020	14-19	11
20/12/2020	0-5	7
20/12/2020	6-10	10
20/12/2020	11-13	10
20/12/2020	14-19	9
21/12/2020	0-5	9
21/12/2020	6-10	4
21/12/2020	11-13	6
21/12/2020	14-19	4
22/12/2020	0-5	6
22/12/2020	6-10	7
22/12/2020	11-13	10
22/12/2020	14-19	16
23/12/2020	0-5	4
23/12/2020	6-10	6
23/12/2020	11-13	4
23/12/2020	14-19	14
24/12/2020	0-5	2
24/12/2020	6-10	9
24/12/2020	11-13	5
24/12/2020	14-19	8
25/12/2020	0-5	6
25/12/2020	6-10	6
25/12/2020	11-13	8
25/12/2020	14-19	15
26/12/2020	0-5	2
26/12/2020	6-10	2
26/12/2020	11-13	2
26/12/2020	14-19	4
27/12/2020	0-5	3
27/12/2020	6-10	1
27/12/2020	11-13	4
27/12/2020	14-19	8
28/12/2020	0-5	3
28/12/2020	6-10	11
28/12/2020	11-13	14
28/12/2020	14-19	6
29/12/2020	0-5	6
29/12/2020	6-10	7
29/12/2020	11-13	6
29/12/2020	14-19	9
30/12/2020	0-5	3
30/12/2020	6-10	8
30/12/2020	11-13	4
30/12/2020	14-19	16
31/12/2020	0-5	6
31/12/2020	6-10	15
31/12/2020	11-13	10
31/12/2020	14-19	10
01/01/2021	0-5	0
01/01/2021	6-10	3
01/01/2021	11-13	1
01/01/2021	14-19	6
02/01/2021	0-5	14
02/01/2021	6-10	18
02/01/2021	11-13	12
02/01/2021	14-19	11
03/01/2021	0-5	2
03/01/2021	6-10	8
03/01/2021	11-13	6
03/01/2021	14-19	12
04/01/2021	0-5	6
04/01/2021	6-10	12
04/01/2021	11-13	13
04/01/2021	14-19	18
05/01/2021	0-5	17
05/01/2021	6-10	13
05/01/2021	11-13	14
05/01/2021	14-19	20
06/01/2021	0-5	1
06/01/2021	6-10	7
06/01/2021	11-13	2
06/01/2021	14-19	14
07/01/2021	0-5	4
07/01/2021	6-10	10
07/01/2021	11-13	8
07/01/2021	14-19	16
08/01/2021	0-5	14
08/01/2021	6-10	18
08/01/2021	11-13	14
08/01/2021	14-19	19
09/01/2021	0-5	7
09/01/2021	6-10	10
09/01/2021	11-13	3
09/01/2021	14-19	15
10/01/2021	0-5	5
10/01/2021	6-10	5
10/01/2021	11-13	9
10/01/2021	14-19	23
11/01/2021	0-5	3
11/01/2021	6-10	6
11/01/2021	11-13	2
11/01/2021	14-19	15
12/01/2021	0-5	7
12/01/2021	6-10	12
12/01/2021	11-13	10
12/01/2021	14-19	17
13/01/2021	0-5	7
13/01/2021	6-10	3
13/01/2021	11-13	8
13/01/2021	14-19	17
14/01/2021	0-5	7
14/01/2021	6-10	9
14/01/2021	11-13	4
14/01/2021	14-19	15
15/01/2021	0-5	2
15/01/2021	6-10	6
15/01/2021	11-13	10
15/01/2021	14-19	12
16/01/2021	0-5	3
16/01/2021	6-10	5
16/01/2021	11-13	7
16/01/2021	14-19	7
17/01/2021	0-5	3
17/01/2021	6-10	7
17/01/2021	11-13	11
17/01/2021	14-19	13
18/01/2021	0-5	7
18/01/2021	6-10	5
18/01/2021	11-13	6
18/01/2021	14-19	17
19/01/2021	0-5	6
19/01/2021	6-10	7
19/01/2021	11-13	5
19/01/2021	14-19	5
20/01/2021	0-5	3
20/01/2021	6-10	1
20/01/2021	11-13	9
20/01/2021	14-19	11
21/01/2021	0-5	9
21/01/2021	6-10	11
21/01/2021	11-13	8
21/01/2021	14-19	7
22/01/2021	0-5	1
22/01/2021	6-10	13
22/01/2021	11-13	8
22/01/2021	14-19	10
23/01/2021	0-5	6
23/01/2021	6-10	14
23/01/2021	11-13	6
23/01/2021	14-19	5
24/01/2021	0-5	6
24/01/2021	6-10	2
24/01/2021	11-13	4
24/01/2021	14-19	7
25/01/2021	0-5	3
25/01/2021	6-10	3
25/01/2021	11-13	5
25/01/2021	14-19	11
26/01/2021	0-5	7
26/01/2021	6-10	13
26/01/2021	11-13	12
26/01/2021	14-19	7
27/01/2021	0-5	5
27/01/2021	6-10	8
27/01/2021	11-13	4
27/01/2021	14-19	11
28/01/2021	0-5	10
28/01/2021	6-10	23
28/01/2021	11-13	13
28/01/2021	14-19	19
29/01/2021	0-5	4
29/01/2021	6-10	8
29/01/2021	11-13	4
29/01/2021	14-19	14
30/01/2021	0-5	3
30/01/2021	6-10	2
30/01/2021	11-13	6
30/01/2021	14-19	9
31/01/2021	0-5	1
31/01/2021	6-10	8
31/01/2021	11-13	7
31/01/2021	14-19	8
01/02/2021	0-5	3
01/02/2021	6-10	2
01/02/2021	11-13	11
01/02/2021	14-19	2
02/02/2021	0-5	4
02/02/2021	6-10	8
02/02/2021	11-13	6
02/02/2021	14-19	14
03/02/2021	0-5	6
03/02/2021	6-10	9
03/02/2021	11-13	12
03/02/2021	14-19	10
04/02/2021	0-5	4
04/02/2021	6-10	12
04/02/2021	11-13	9
04/02/2021	14-19	9
05/02/2021	0-5	0
05/02/2021	6-10	4
05/02/2021	11-13	9
05/02/2021	14-19	11
06/02/2021	0-5	7
06/02/2021	6-10	10
06/02/2021	11-13	0
06/02/2021	14-19	8
07/02/2021	0-5	5
07/02/2021	6-10	2
07/02/2021	11-13	5
07/02/2021	14-19	8
08/02/2021	0-5	1
08/02/2021	6-10	2
08/02/2021	11-13	1
08/02/2021	14-19	5
09/02/2021	0-5	3
09/02/2021	6-10	5
09/02/2021	11-13	6
09/02/2021	14-19	12
10/02/2021	0-5	2
10/02/2021	6-10	3
10/02/2021	11-13	5
10/02/2021	14-19	11
11/02/2021	0-5	3
11/02/2021	6-10	8
11/02/2021	11-13	2
11/02/2021	14-19	11
12/02/2021	0-5	5
12/02/2021	6-10	5
12/02/2021	11-13	4
12/02/2021	14-19	10
13/02/2021	0-5	8
13/02/2021	6-10	12
13/02/2021	11-13	6
13/02/2021	14-19	8
14/02/2021	0-5	1
14/02/2021	6-10	4
14/02/2021	11-13	11
14/02/2021	14-19	11
15/02/2021	0-5	12
15/02/2021	6-10	23
15/02/2021	11-13	7
15/02/2021	14-19	14
16/02/2021	0-5	4
16/02/2021	6-10	15
16/02/2021	11-13	11
16/02/2021	14-19	20
17/02/2021	0-5	12
17/02/2021	6-10	11
17/02/2021	11-13	10
17/02/2021	14-19	11
18/02/2021	0-5	4
18/02/2021	6-10	11
18/02/2021	11-13	6
18/02/2021	14-19	11
19/02/2021	0-5	13
19/02/2021	6-10	10
19/02/2021	11-13	12
19/02/2021	14-19	30
20/02/2021	0-5	8
20/02/2021	6-10	16
20/02/2021	11-13	11
20/02/2021	14-19	13
21/02/2021	0-5	6
21/02/2021	6-10	11
21/02/2021	11-13	9
21/02/2021	14-19	10
22/02/2021	0-5	7
22/02/2021	6-10	17
22/02/2021	11-13	9
22/02/2021	14-19	12
23/02/2021	0-5	21
23/02/2021	6-10	8
23/02/2021	11-13	6
23/02/2021	14-19	20
24/02/2021	0-5	8
24/02/2021	6-10	8
24/02/2021	11-13	7
24/02/2021	14-19	18
25/02/2021	0-5	11
25/02/2021	6-10	18
25/02/2021	11-13	15
25/02/2021	14-19	17
26/02/2021	0-5	14
26/02/2021	6-10	14
26/02/2021	11-13	15
26/02/2021	14-19	28
27/02/2021	0-5	11
27/02/2021	6-10	24
27/02/2021	11-13	14
27/02/2021	14-19	18
28/02/2021	0-5	6
28/02/2021	6-10	8
28/02/2021	11-13	3
28/02/2021	14-19	12
01/03/2021	0-5	9
01/03/2021	6-10	20
01/03/2021	11-13	18
01/03/2021	14-19	36
02/03/2021	0-5	14
02/03/2021	6-10	10
02/03/2021	11-13	8
02/03/2021	14-19	23
03/03/2021	0-5	5
03/03/2021	6-10	13
03/03/2021	11-13	13
03/03/2021	14-19	23
04/03/2021	0-5	12
04/03/2021	6-10	21
04/03/2021	11-13	10
04/03/2021	14-19	29
05/03/2021	0-5	10
05/03/2021	6-10	18
05/03/2021	11-13	9
05/03/2021	14-19	18
06/03/2021	0-5	16
06/03/2021	6-10	30
06/03/2021	11-13	23
06/03/2021	14-19	27
07/03/2021	0-5	6
07/03/2021	6-10	28
07/03/2021	11-13	16
07/03/2021	14-19	27
08/03/2021	0-5	17
08/03/2021	6-10	21
08/03/2021	11-13	12
08/03/2021	14-19	36
09/03/2021	0-5	5
09/03/2021	6-10	7
09/03/2021	11-13	8
09/03/2021	14-19	12
10/03/2021	0-5	11
10/03/2021	6-10	9
10/03/2021	11-13	13
10/03/2021	14-19	23
11/03/2021	0-5	13
11/03/2021	6-10	14
11/03/2021	11-13	15
11/03/2021	14-19	10
12/03/2021	0-5	14
12/03/2021	6-10	9
12/03/2021	11-13	12
12/03/2021	14-19	17
13/03/2021	0-5	11
13/03/2021	6-10	13
13/03/2021	11-13	11
13/03/2021	14-19	12
14/03/2021	0-5	4
14/03/2021	6-10	10
14/03/2021	11-13	8
14/03/2021	14-19	15
15/03/2021	0-5	13
15/03/2021	6-10	14
15/03/2021	11-13	11
15/03/2021	14-19	18
16/03/2021	0-5	14
16/03/2021	6-10	15
16/03/2021	11-13	12
16/03/2021	14-19	13
17/03/2021	0-5	9
17/03/2021	6-10	10
17/03/2021	11-13	9
17/03/2021	14-19	20
18/03/2021	0-5	7
18/03/2021	6-10	16
18/03/2021	11-13	9
18/03/2021	14-19	16
19/03/2021	0-5	11
19/03/2021	6-10	16
19/03/2021	11-13	15
19/03/2021	14-19	24
20/03/2021	0-5	19
20/03/2021	6-10	16
20/03/2021	11-13	8
20/03/2021	14-19	5
21/03/2021	0-5	9
21/03/2021	6-10	8
21/03/2021	11-13	9
21/03/2021	14-19	14
22/03/2021	0-5	13
22/03/2021	6-10	11
22/03/2021	11-13	10
22/03/2021	14-19	12
23/03/2021	0-5	1
23/03/2021	6-10	5
23/03/2021	11-13	5
23/03/2021	14-19	9
24/03/2021	0-5	8
24/03/2021	6-10	5
24/03/2021	11-13	2
24/03/2021	14-19	11
25/03/2021	0-5	8
25/03/2021	6-10	20
25/03/2021	11-13	7
25/03/2021	14-19	20
26/03/2021	0-5	9
26/03/2021	6-10	5
26/03/2021	11-13	8
26/03/2021	14-19	20
27/03/2021	0-5	4
27/03/2021	6-10	6
27/03/2021	11-13	4
27/03/2021	14-19	8
28/03/2021	0-5	1
28/03/2021	6-10	4
28/03/2021	11-13	3
28/03/2021	14-19	4
29/03/2021	0-5	6
29/03/2021	6-10	9
29/03/2021	11-13	3
29/03/2021	14-19	6
30/03/2021	0-5	10
30/03/2021	6-10	7
30/03/2021	11-13	5
30/03/2021	14-19	15
31/03/2021	0-5	6
31/03/2021	6-10	6
31/03/2021	11-13	8
31/03/2021	14-19	19

## Sheet: Weekly average
Date	0-5	6-10	11-13	14-19	0-19
2020-09-01	15.8403	23.3945	24.2131	41.397	26.5983
2020-09-08	27.7206	31.1927	6.05327	15.0534	21.2786
2020-09-15	7.92016	19.4955	30.2663	37.6336	23.4065
2020-09-22	3.96008	23.3945	12.1065	33.8702	19.1508
2020-09-29	7.92016	23.3945	42.3729	56.4504	31.9179
2020-10-06	27.7206	15.5964	18.1598	101.611	43.6212
2020-10-13	27.7206	35.0918	127.119	210.748	98.9456
2020-10-20	51.4811	70.1836	302.663	459.13	215.978
2020-10-27	87.1218	218.349	326.877	737.619	348.97
2020-11-03	150.483	241.744	447.942	669.878	374.504
2020-11-10	102.962	261.239	375.303	545.687	319.179
2020-11-17	126.723	237.845	314.77	560.741	312.796
2020-11-24	150.483	171.56	217.918	331.176	219.17
2020-12-01	186.124	534.176	351.09	380.099	364.929
2020-12-08	190.084	288.533	326.877	252.145	258.535
2020-12-15	182.164	159.863	375.303	270.962	235.129
2020-12-22	102.962	163.762	284.504	267.199	197.891
2020-12-29	146.523	276.835	314.77	308.596	257.471
2021-01-05	201.964	269.037	314.77	459.13	312.796
2021-01-12	142.563	183.257	338.983	368.809	252.152
2021-01-19	134.643	198.854	272.397	210.748	197.891
2021-01-26	130.683	249.542	345.036	263.435	238.321
2021-02-02	106.922	183.257	254.237	244.618	192.572
2021-02-09	134.643	233.945	248.184	289.779	225.554
2021-02-16	213.844	354.817	411.622	402.68	340.458
2021-02-23	316.807	389.909	472.155	560.741	433.02
2021-03-02	316.807	549.772	550.847	688.695	526.646
2021-03-09	281.166	296.331	472.155	402.68	353.225
2021-03-16	324.727	358.716	435.835	391.389	372.376
2021-03-23	146.523	210.551	193.705	293.542	213.85
2021-03-30	63.3613	50.6882	78.6925	127.954	80.8588
